1 **Inhibition of PDE4 by Roflumilast ameliorates sleep deprivation-induced cognitive**  
2 **dysfunction in C57BL/6J mice**

3 Abid Bhat<sup>1,2</sup>, Muhammed Bishir<sup>1,2</sup>, SR. Pandi-Perumal<sup>3</sup>, Sulie Chang<sup>4</sup>, Saravana B.  
4 Chidambaram<sup>1,2,5</sup>

5 1. Dept. of Pharmacology, JSS College of Pharmacy, JSS Academy of Higher Education &  
6 Research, Mysuru, India

7 2. Centre for Experimental Pharmacology and Toxicology, Central Animal Facility, JSS  
8 Academy of Higher Education & Research, Mysuru, India

9 3. Somnogen Canada Inc, College Street, Toronto, ON, Canada

10 4. Department of Biological Sciences and Institute of Neuroimmune Pharmacology, Seton  
11 Hall University, 400 South Orange Ave South Orange, NJ 07079, USA

12 5. Special Interest Group □ Brain, Behaviour and Cognitive Neurosciences, JSS Academy  
13 of Higher Education & Research, Sri Shivarathreeshwara Nagar, Mysuru, Karnataka  
14 570015, India

15

16 \* **Corresponding author**

17 **Dr. C. Saravana Babu**, MPharm, PhD, FASc (AW), FIC, FST  
18 Prof & Coordinator Central Animal Facility  
19 Dept of Pharmacology, JSS College of Pharmacy  
20 JSS Academy of Higher Education & Research  
21 S.S. Nagar, Mysuru - 570015  
22 Email: babupublications@gmail.com  
23

24

25 **Highlights**

- 26 ■ Sleep deprivation (SD) impaired recognition memory in mice.  
27 ■ SD increased PDE4B, amyloid-beta (A $\beta$ ), and reduced cAMP, pCREB, BDNF, and  
28 synaptic proteins (Synapsin I, SAP 97, PSD 95) expression.  
29 ■ Treatment with Roflumilast improved memory and decreased A $\beta$  pathology in sleep-  
30 deprived mice.  
31 ■ Increased in cAMP level correlates with improved expression of synaptic proteins and  
32 memory  
33

34 **Abstract**

35 Sleep deprivation interferes with long-term memory and cognitive functions by over-  
36 activation of phosphodiesterase (PDE) enzymes. PDE4 is a non-redundant regulator of the  
37 cyclic nucleotides (cAMP), is densely expressed in the hippocampus, and is involved in  
38 learning and memory processes. In the present study, we investigated the effects of  
39 Roflumilast (ROF), a PDE4 inhibitor, on sleep deprivation induced cognitive dysfunction in a  
40 mouse model. Memory assessment was performed using a novel object recognition task and  
41 the cAMP level was estimated by ELISA. The alterations in the expressions of PDE4B,  
42 amyloid beta, CREB, BDNF, and synaptic proteins (Synapsin I, SAP 97, PSD 95) were  
43 assessed to gain insights on the possible mechanisms of action of ROF using the western blot  
44 technique. Results show that ROF reverse SD induced cognitive decline in mice. ROF down-  
45 regulated PDE4B and amyloid beta expressions. Additionally, ROF improved cAMP levels  
46 and the expressions of synapsin I, SAP 97, and PSD 95 in the hippocampal region of SD  
47 mice. Taken together, these results suggest that ROF can suppress the deleterious effects of  
48 SD-induced cognitive dysfunction via PDE4-mediated cAMP/CREB/BDNF cascade.

49 **Keywords:** Sleep deprivation, PDE4, Roflumilast, Memory, cAMP, Synaptic proteins

50

51

52

53

54 **Introduction**

55 Sleep plays a regulatory role in maintaining cellular and metabolic homeostasis. Increasing  
56 evidence have shown that sleep disturbances affect higher brain functions such as learning  
57 and memory, and is also linked to various neurological disorders (1–3). Sleep deprivation  
58 (SD) is considered as a public health epidemic and impose a negative impact on social, and  
59 economic wellbeing (4,5). Accumulating evidence suggest that SD reduces neurogenesis and  
60 transcription factors (CREB, BDNF) expression which are crucial regulators for learning and  
61 memory and induce hippocampal atrophy (6–8). Functional magnetic resonance imaging  
62 (fMRI) and behavioral studies from 150 picture slides showed that one-night sleep  
63 deprivation substantially compromises hippocampal function in humans in turn affects  
64 memory (9). Evidence also suggests that sleep disturbance predisposes brain accumulation of  
65 amyloid- $\beta$  (A $\beta$ ) (10–12). Positron emission tomography (PET) in humans confirmed that SD  
66 and sleep fragmentation are associated with increased deposition of A $\beta$  in the brain (13,14).

67 A mechanistic research report indicates that SD promotes synthesis (15) and impairs the  
68 clearance of A $\beta$  protein (15). Intriguingly, the relationship between sleep disturbance and A $\beta$   
69 is bidirectional because increased A $\beta$  deposition the other way was also shown to impair slow  
70 wave sleep (16). Furthermore, A $\beta$  reduces the protein expression of Synapsin I, PSD-95, and  
71 SAP-102, which indicates that it eliminates synapses and causes loss of neuronal network  
72 (17–19). This synapto-toxic effect of A $\beta$  are linked to the reduced expression of NMDA  
73 receptors and decreased cAMP content (20,21). The increased accumulation of A $\beta$  and  
74 reduced levels of cAMP impairs the release of transcription factors that regulate brain  
75 development and synaptic plasticity (22,23).

76 Phosphodiesterases (PDE) are a diverse family of enzymes/proteins that play a role in cell  
77 functioning by regulating intracellular signaling (24). An increased expression of PDE4  
78 enzymes hydrolyse cAMP into inactive forms which have been consistently observed in  
79 brains of Alzheimer's disease (AD) (25), and subjects with cognitive impairment (26) and  
80 also in the hippocampal region of sleep-deprived mice (27). Inhibition of PDE4 improved  
81 learning and memory in a mouse model of AD via increasing hippocampal cAMP levels  
82 (25,28). Furthermore, inhibition of PDE4 has also restored the deficits in synaptic proteins  
83 such as synaptophysin, PSD 95 (29,30).

84 Many reports suggest that PDE4 is a viable target in neurological disorders drug discovery  
85 (31). PDE4 inhibition was shown to reverse the cognitive decline induced by muscarinic  
86 receptor antagonist (32) and also by modulating NMDA receptors mediated transduction  
87 mechanisms in rat models. Albeit, the NMDA does not affect PDE4 expression directly, but

88 the balance between PDE4 and NMDA mediated adenylyl cyclase plays a pivotal role in the  
89 memory process (33). ROF, a cAMP-specific PDE4 inhibitor, is approved by USFDA for use  
90 in chronic obstructive pulmonary disease (COPD) (34). ROF promotes hippocampal neuron  
91 viability (35) and improve memory in rodents and monkeys at non-emetic doses (36). In a  
92 clinical study, it is observed that acute administration of ROF improves learning and memory  
93 in healthy individuals (37). These data open the question that whether PDE4 inhibition has  
94 any role on the levels of A $\beta$  and associated synaptic dysfunction, particularly in sleep-  
95 deprived conditions.

96 Long-term SD could produce AD-like pathological state, wherein increased neuronal  
97 accumulations of A $\beta$ , decreased cAMP and synaptic proteins expressions are well  
98 established. On the other hand, a fully blown AD imposes various therapeutic challenges.  
99 This spurt interest to investigate whether PDE4 expression has any correlation with A $\beta$ ,  
100 CREB, BDNF expression in SD brains, and also to study the effect PDE4 inhibition, using  
101 ROF, on cognitive function in sleep-deprived mice.

102

## 103 **Materials and Methods**

### 104 **Animals.**

105 Male C57BL/6J mice (25-30 g) were obtained from Adita Biosys Private Limited, Tumakuru,  
106 Karnataka, and housed in Central Animal Facility, JSS Academy of Higher Education &  
107 Research, Mysuru, Karnataka. Animals were housed in groups (5 animals/cage) in  
108 polypropylene cages under an ambient temperature of 19-26°C and 40-65% relative humidity,  
109 with a 12-h light/dark artificial light cycle. Animals were provided with standard rodent feed  
110 and purified water ad libitum. Animals were acclimatized for 7 days to the laboratory  
111 conditions prior to initiation of the experiments. Animal experiments were performed in full  
112 compliance with the guidelines of “Guide for the Care and Use of Laboratory Animals”  
113 (Institute of Laboratory Animal Resources, National Academic Press 1996; NIH publication  
114 number nos. 85–23, revised 1996). Institutional Animal Ethics Committee (IAEC), Central  
115 Animal Facility, JSS AHER, Mysuru, India approved the study  
116 (JSSAHER/CPT/IAEC/014/2020).

117

### 118 **Reagents and antibodies**

119 Roflumilast, Cresyl violet and Congo red stains were purchased from Sigma Aldrich (India).  
120 cAMP ELISA kit was purchased from Cayman (Ann Arbor, MI, USA). Anti-PSD95 (sc-

121 32290), Anti-SAP97 (sc-9961), Anti-Synapsin-I (sc-376623), Anti-BDNF (sc-65514), Anti-  
122 CREB (sc-377154), Anti  $\beta$ -Amyloid (sc-28365) were procured from Santa Cruz  
123 Biotechnology, CA, USA. Anti-PDE4B (NB100-2562) was purchased from Novus  
124 Biologicals, United States. All other reagents and chemicals were analytical grade.

125

### 126 **Roflumilast treatment**

127 Roflumilast (ROF L: 1 mg/kg and ROF H: 3 mg/kg) freshly prepared in 0.5% CMC was  
128 given intraperitoneally once a day for three days. The dosages of Roflumilast were selected  
129 based on our earlier reports (38).

130

### 131 **Sleep deprivation method**

132 A modified multiple platform method was used for the induction of sleep deprivation (39).  
133 Mice were placed in cages (41 cm x 34 cm x 16.5 cm), containing platforms (3 cm in  
134 diameter) surrounded by water up to 1 cm beneath the surface. Mice were allowed to freely  
135 move inside the cage and jump from one platform to the other but were not in a position to lie  
136 down. This method is reported to primarily eliminate REM sleep (40). Non sleep deprived  
137 (NSD) animals were kept in their cages in the same room. During sleep deprivation, mice had  
138 access to food and water. Water in the cages was changed twice a day. Animals were sleep-  
139 deprived for 72 hours. The flow of the experiment is provided in figure 1.

140

### 141 **Experimental groups**

142 Animals were randomized based on the bodyweight into 4 groups, i.e. – Non-sleep-deprived  
143 (NSD) + Vehicle (Cage control and CMC treated); SD + Vehicle (CMC treated); SD + ROF  
144 L (1 mg/kg b.wt); SD + ROF (3 mg/kg b.wt.). Each group contained 10 animals.

145

### 146 **Novel object recognition test**

147 Novel object recognition task was performed to access the recognition memory as described  
148 previously (41). Mice were habituated to explore the empty apparatus for 10 min (2<sup>nd</sup> day of  
149 treatment). During the acquisition trial (T1), two similar objects were placed inside the  
150 apparatus and the mouse was allowed to explore the objects for 3 min. After the acquisition  
151 trial, the mouse was transferred to its home cage. Discrimination trial (T2) was done twenty-  
152 four hours later (4th day). Two different objects, a familiar object, and a novel object were  
153 placed in the exploration area. The time spent by the animal exploring the two objects during

154 T2 was recorded and the discrimination index (DI) was calculated, as per the following  
155 formula.  $DI=RI/(\text{Time spent in exploring novel object} + \text{Time spent in exploring familiar}$   
156  $\text{object})$ . Recognition Index = Time spent in exploring novel object-Time spent in exploring  
157 the familiar objects. This test was repeated for all the animals in all the cages one at a time.  
158 All behavioral assessments were done between 10 am to 3pm.

159

### 160 **Measurement of cAMP content**

161 Hippocampal tissues for each of the animal groups were individually homogenized in 500  $\mu\text{L}$   
162 of 0.1M Hydrochloric acid to purify tissue samples from PDE enzymes. Homogenates were  
163 centrifuged for 10 min at  $1500\times g$  at  $4^{\circ}\text{C}$ , and the supernatants were stored at  $4^{\circ}\text{C}$ . cAMP  
164 levels were determined by cAMP enzyme immunoassay kit following the manufacturer's  
165 instructions (Cayman Chemical Co., Ann Arbor, MI, USA)

166

### 167 **Western blot**

168 Following all the behavioral assessments, the animals were euthanized to collect the brain  
169 and stored at  $-80^{\circ}\text{C}$ . Hippocampal regions were isolated, and homogenates were prepared  
170 with radioimmunoprecipitation assay buffer (RIPA) buffer (50 mM Tris, pH 7.4, 150 mM  
171 NaCl, 1% NP-40, 5 mM EDTA, 0.5% sodium deoxycholate, 0.1% SDS, 50 nM sodium  
172 fluoride, 1 mM sodium vanadate) containing a cocktail of protease inhibitor (Sigma Aldrich,  
173 MO, USA). Total protein concentrations of the samples were determined by the Pierce™  
174 bicinchoninic acid (BCA) protein assay (Thermofisher scientific), homogenate samples were  
175 aliquoted and stored at  $-80^{\circ}\text{C}$  until further use. Sample proteins (20  $\mu\text{g}$ ) were separated by  
176 using 10% bis-tris -SDS-PAGE (electrophoresis). Resolved proteins in the gels were  
177 transferred onto polyvinylidene difluoride (PVDF) membranes (Biorad) and electroblotted.  
178 Membranes were blocked overnight with 5% non-fat skimmed milk in Tris-Buffered Saline  
179 and Tween 20 (TBST) at  $4^{\circ}\text{C}$ . This was followed by a 4-hour incubation with the primary  
180 antibodies (PDE4B (1:1000), CREB (1:1000), BDNF (1:1000),  $\beta$ -Amyloid (1:1000), PSD-95  
181 (1:1000), Synapsin-I (1:1000), SAP 97 (1:1000) at room temperature. The membranes were  
182 rinsed with TBST (3 washings for 10 minutes each), followed by incubation with the  
183 secondary antibodies (HRP conjugated anti-mouse or anti-rabbit IgG) for 1h at room  
184 temperature and washed with TBST (3 washings for 10 minutes each). Bands were detected  
185 using SuperSignal West Pico PLUS Chemiluminescent Substrate (Thermo Scientific).  
186 Densitometric measurement of bands was done using ImageJ (NIH software). For Western  
187 blot analysis, the signal intensity (integrated density value, IDV) of PDE4B, BDNF,  $\beta$ -

188 Amyloid, PSD-95, Synapsin-I and SAP 97 was normalized against the IDV of internal control  
189  $\beta$ -actin, while pCREB was normalized with total CREB and histogram was plotted.

190

### 191 **Histopathology**

192 Whole brain was stored in buffered 10% formalin for 48h. Coronal sections (3-5  $\mu$ m) of the  
193 hippocampus region were cut using a microtome. The hippocampal region of the brain was  
194 used for histopathological analysis. Sections were mounted on a slide, washed, and  
195 dehydrated with 95% ethanol.

196

### 197 **Nissl staining**

198 Coronal sections (3-5  $\mu$ m) of the hippocampus region were washed with xylene flowed by  
199 five times washing with water for 5 mins each. The samples were stained with 0.2% cresyl  
200 violet dye for 30 mins. The prepared slides were examined under the microscope by a  
201 pathologist for histopathological analyses.

202

### 203 **Congo red staining**

204 Congo red staining was done to detect amyloid plaques in mice hippocampus. Coronal  
205 sections (3-5  $\mu$ m) of the hippocampus region were stained with 1 % Congo Red stain for 30  
206 mins. Amyloid plaques were observed under a microscope.

207

### 208 **Statistical analysis**

209 Data are presented as mean  $\pm$ SEM. The difference between time spent exploring the novel  
210 object versus familiar object during the discrimination trial was calculated for each group and  
211 the level of significance was analyzed using a two-sided student's t-test. For other parameters,  
212 group means differences were analyzed using a one-way ANOVA test followed by Tukey's  
213 multiple comparison test as post hoc. Pearson's correlation analysis was performed using  
214 SYSTAT 11 (SPSS Inc, Chicago, IL). Graphs were plotted using GraphPad Prism version  
215 7.04 with  $p < 0.05$  considered significant.

216

## 217 **RESULTS**

### 218 **PDE4B expression is up-regulated in SD mice brains and ROF down-regulated PDE4B**

219 PDE4B is an important PDE expressed in the hippocampal region. Changes in the PDE4B  
220 expression have been associated with cognitive functions (42). We assessed the impact of  
221 sleep deprivation on PDE4B expression in mice. 72h continuous SD induced a significant ( $p$

222 < 0.05) increase in PDE4B expression when compared with the NSD group. We determined  
223 whether ROF administration reduces the SD induced PDE4B expression. Daily dose of ROF  
224 down-regulated PDE4B expression when compared with vehicle-treated SD group. A  
225 significant ( $p < 0.01$ ) decrease in PDE4B expression was found at a dose of 3 mg/kg of ROF.  
226 Correlation analysis revealed that PDE4B possesses a strong positive correlation with  $\beta$ -  
227 amyloid ( $r = 0.8167$ ) (**Fig 2A**).

228

### 229 **Sleep deprivation increased $\beta$ -amyloid deposition in mice brains and roflumilast down-** 230 **regulated its expression**

231 Neuronal damage is the outcome of excessive deposition of  $\beta$ -amyloid in brain (43).  
232 Impaired sleep has been associated with AD as sleep plays a role in clearing the metabolic  
233 waste from the brain (11). We performed Western blotting to study the impact of sleep  
234 deprivation on  $\beta$ -amyloid expression in mice hippocampal region. 72 h of SD significantly  
235 ( $p < 0.01$ ) increased  $\beta$ -amyloid expression in vehicle-treated mice when compared to the non-  
236 sleep deprived mice. Inhibition of PDE4B by ROF significantly ( $p < 0.01$ ) reduced the  
237 expression of  $\beta$ -amyloid in mice when compared with the SD control group. Correlation  
238 analysis revealed that  $\beta$ -amyloid possesses a strong negative correlation with Synapsin ( $r = -$   
239  $0.9733$  [ $p < <0.0001$ ]), SAP 97 ( $r = -0.5594$  [ $p < <0.0045$ ]) and PSD 95 ( $r = -0.4979$  [ $p <$   
240  $<0.0133$ ]) in sleep-deprived mice. This data indicates that the PDE4B enzyme has a potential  
241 role on  $\beta$ -amyloid expression in the SD state (**Fig 2B**).

242 An increase in  $\beta$ -amyloid deposition was further confirmed by Congo red staining in the  
243 hippocampal region of SD mice. We found that vehicle-treated SD mice showed multifocal  
244 and moderate increased deposition of amyloid at CA1 and DG region of the hippocampus  
245 compared with vehicle-treated NSD group (**Fig.3**). As shown in Fig. 3 ROF L treated SD  
246 mice showed mild deposition of amyloid at hippocampus CA1 and DG regions.

247

### 248 **Roflumilast improves hippocampal cAMP levels in sleep-deprived mice**

249 cAMP mediates fundamental brain functions relevant to learning and memory. Decline of  
250 cAMP levels in hippocampus impairs the memory consolidation (42). To determine the  
251 impact of sleep deprivation on cAMP levels in the hippocampus region of mice. We  
252 performed an ELISA assay and found that SD significantly ( $p < 0.01$ ) reduced cAMP levels  
253 in vehicle-treated mice when compared with vehicle-treated NSD group. Administration of  
254 ROF in sleep-deprived mice showed a significant ( $p < 0.001$ ) increase in the levels of cAMP



255 when compared with vehicle-treated SD group. This indicates that ROF administration  
256 rescues sleep deprivation induced decrease in cAMP levels in mice. Correlation analysis  
257 revealed a strong negative correlation with  $\beta$ -amyloid ( $r = -0.8162$ ) and a strong positive  
258 correlation with CREB ( $r = 0.927$ ) and BDNF ( $r = 0.886$ ) respectively (**Fig. 4**).

259

#### 260 **Roflumilast improved CREB and BDNF expression in the hippocampus of SD mice**

261 Subsequently, we assessed the impact of sleep deprivation on the hippocampal expression of  
262 transcription factors CREB and BDNF. We found that 72-hour sleep deprivation produced a  
263 significant ( $p < 0.01$ ) decrease in hippocampal pCREB expression as compared to the NSD  
264 control group. Administration of ROF restored the levels of pCREB when compared with the  
265 SD control group. A significant ( $p < 0.001$ ) increase in pCREB was observed when compared  
266 with vehicle-treated SD mice (**Fig. 5A**). CREB influences the expression of BDNF which is  
267 essential in memory consolidation and synaptic function (6), we performed western blot  
268 analysis to detect BDNF expression in the hippocampus region of mice. As shown in **Fig. 5B**,  
269 SD significantly ( $p < 0.001$ ) decreased the expression of BDNF when compared with NSD  
270 mice. ROF administration in sleep-deprived mice significantly ( $p < 0.001$ ) increased BDNF  
271 expression when compared to vehicle-treated SD mice. These data suggest that ROF  
272 administration improves the expression of transcription factors in SD mice, which might be  
273 due to the decreased A $\beta$  toxicity.

274

#### 275 **Roflumilast up-regulates the expression of synaptic associated proteins in sleep- 276 deprived mice**

277 Next, we investigated whether improvement in neurotrophic factor expression influences  
278 synaptic proteins expression in hippocampus region of SD mice. Synapsin I expression  
279 decreased significantly ( $p < 0.01$ ) following SD when compared with the NSD control group.  
280 ROF administration significantly ( $p < 0.01$ ) up-regulated the expression of Synapsin I when  
281 compared with vehicle-treated SD mice (**Fig 6**). SAP 97 regulates synaptic plasticity by  
282 controlling the distribution of glutamate receptors (44). We found a significant decrease in  
283 the expression of SAP-97 in SD mice when compared with NSD mice. ROF treatment  
284 showed a significant increase in the expression of SAP-97 when compared with vehicle-  
285 treated SD mice (**Fig 6**).

286 Next, we investigated the impact of sleep deprivation on the expression of post-synaptic  
287 protein PSD95, we found that 72 h of sleep deprivation caused a significant ( $p < 0.01$ )

288 decrease in the expression of PSD 95 when compared with NSD mice. Administration of  
289 ROF significantly up-regulated ( $p < 0.01$ ) the expression of PSD95 in SD mice when  
290 compared with vehicle SD mice (**Fig 6**). These results imply PDE4 inhibition may improve  
291 synaptic functions, which might be due to its restoration of neurotrophic factors, at least  
292 partly, in SD mice

293

#### 294 **Roflumilast restores sleep-deprived induced cognitive dysfunction in mice**

295 Recognition memory was assessed by a novel object recognition test. Sleep-deprived mice  
296 did not show a significant difference in the time spent between familiar and novel objects  
297 when compared with NSD mice. SD mice administered with ROF showed significantly  
298 (1mg/kg;  $p < 0.05$ , 3mg/kg;  $p < 0.01$ ) increased time spent in novel object than the familiar  
299 object. (**Fig. 7a**). SD significantly ( $p < 0.01$ ) decreased the discrimination index in mice,  
300 whereas ROF significantly (1mg/kg;  $p < 0.05$ , 3mg/kg;  $p < 0.01$ ) increased the discrimination  
301 index in SD mice (**Fig. 7b**). These results indicate that ROF can restore recognition memory  
302 in SD mice.

303

#### 304 **Roflumilast prevented the morphological changes of hippocampal neurons in sleep- 305 deprived mice**

306 SD induced multifocal moderate neuronal degeneration in the CA1 and dentate gyrus regions  
307 of the hippocampus. As shown in fig.6, neurons in CA1 and DG regions in vehicle-treated  
308 SD mice showed a decrease in purple Nissl granules and pyknotic nucleus in the perikarya  
309 when compared with NSD mice. ROF treated mice showed reduced morphological changes  
310 and had regularly shaped cell bodies in CA1 and DG regions when compared with SD mice  
311 (**Fig 8**).

312

#### 313 **Discussion**

314 The present study demonstrates the molecular pathogenetic mechanism behind SD-induced  
315 cognitive dysfunctions and the protective effects of PDE4 inhibition using Roflumilast. Our  
316 findings reveal that alleviation of A $\beta$  pathology, cAMP signaling, and synaptic proteins  
317 expression by Roflumilast via PDE4 inhibition as a crucial mechanism in cognitive  
318 restoration in SD mice.

319 SD aggravates A $\beta$  plaque levels in AD transgenic mouse models (45). A recent study has  
320 shown that chronic sleep restriction (3 h per day, 5 days per week, for 4 weeks) increases the

321 accumulation of hippocampal A $\beta$  in mice, which was corroborated to cognitive decline (46).  
322 A $\beta$  deposition in cortical and hippocampal regions initiates inflammatory responses, synaptic  
323 dysfunctions (47) and neuronal apoptosis (48). A $\beta$  also compromises the cAMP-response  
324 element-binding protein signaling in neurons suggesting that multiple factors contribute to  
325 neuronal damage in SD (49).

326 On the other hand, increased expression of PDE4 is reported to associate with A $\beta$  plaque  
327 pathology and memory loss (50). Studies using PDE4 knockout mice showed an improved  
328 memory and reduced neuroinflammation and  $\beta$ -amyloidosis (51–53). In the present study, we  
329 found that 72 h SD increased the protein expression and deposition of A $\beta$  in hippocampal  
330 neurons mice. Earlier, *in vivo* studies and clinical trials have shown that alleviating cAMP  
331 signaling through PDE4 inhibition improved cognitive functions (54,55) and by reducing the  
332 A $\beta$  expression in mice (56). The present study reports an increased PDE4 and A $\beta$  expression  
333 in SD mice brains with a significant decrease in cAMP levels. Treatment with ROF reversed  
334 the changes including A $\beta$  pathology that indicates that PDE4 improves cognition in SD mice  
335 probably via alleviating A $\beta$  synthesis or clearance.

336 Synapse dysfunction is an early consequence of A $\beta$  deposition (57). PSD-95 is an essential  
337 regulator of synaptic strength and plasticity. SAP-97 facilitates synaptic plasticity, synaptic  
338 vesicles biogenesis, and neurotransmitters release (58). Synapsin I involves in the modulation  
339 of neurotransmitters release and its down-regulation is shown to impair neurogenesis and  
340 synaptic plasticity (59,60). SD causes synaptic damage in the hippocampus by reducing the  
341 expression of presynaptic and postsynaptic proteins (61–63). Alterations in PSD95 and SAP-  
342 97 levels adversely affect synaptic connectivity and neural regeneration (64). Recently, we  
343 have shown that ROF improves synaptic proteins expression in human neurons exposed to  
344 quinolinic acid-induced neurotoxicity (29). The present study shows that SD down-regulated  
345 synaptic proteins (SAP-97, Synapsin-I, and PSD-95) in the hippocampal region of mice.  
346 Nevertheless, administration of ROF increased SAP-97, Synapsin-I, and PSD-95 expression,  
347 which indicates that PDE4 enzymes play a role in synaptic proteins expression.

348 Cyclic nucleotides play a vital role in memory consolidation (65). Inhibition of cAMP  
349 signaling in the hippocampal region is reported to impair consolidation of long-term memory  
350 in mice (66). SD reduces the phosphorylation of CREB in the hippocampus and affects the  
351 protein expression of neurotrophic factor BDNF (6). Particularly, long-term memory is  
352 critically dependent on CREB mediated expression of neurotrophic factors such as BDNF  
353 (61). In the present study, ROF administration restores the cAMP/CREB/BDNF signaling

354 cascade in SD mice. These results are in agreement with earlier studies that report that  
355 inhibition of PDE4 improves memory consolidation in rodent models via  
356 cAMP/CREB/BDNF cascade, which reveals that PDE4 is connected with this signaling  
357 cascade (32,67).

358 Histopathology examination using Congo red staining showed higher deposition of A $\beta$   
359 aggregates in CA1 and DG region of the hippocampal region in SD mice. Further Cresyl  
360 violet staining showed cell death in the hippocampus region of SD mice indicating apoptosis.  
361 Recent studies have shown that SD increases cytokine production, microglial activation and  
362 initiates neuronal apoptosis, causing lesions in the hippocampus of mice (68,69). Interestingly  
363 PDE4 expression is regulated by inflammation and microglial reactivity (70). Transient  
364 increase in cAMP stimulates cAMP signal transduction inhibiting inflammatory mediators  
365 and early apoptotic factors (71). Nissl staining showed that ROF administration prevented  
366 neuronal damage in SD mice. Earlier studies have reported that inhibition of PDE4 reduces  
367 the levels of pro-inflammatory and early apoptosis factors (72).

368

### 369 **Conclusion**

370 From the current investigation we provided molecular, behavioral and histopathological  
371 evidence that Roflumilast rescues SD induced cognitive dysfunction in mice. Roflumilast  
372 administration improves recognition memory via PDE4 inhibition mediated  
373 cAMP/CREB/BDNF signaling and downregulation of A $\beta$  pathology in SD mice.  
374 Additionally, further studies to understand the effect of Roflumilast on NMDA activity and  
375 autophagy in chronic sleep restriction are still being investigated.

### 376 **Acknowledgments**

377 Mr. Abid Bhat acknowledges Senior Research Fellowship (45/07/2019/PHA/BMS) from the  
378 Indian Council of Medical Research (ICMR, New Delhi, India).

379

### 380 **Conflict of Interest**

381 All the authors in this study declare no potential conflicts of interest in research and  
382 publishing this article.

### 383 **Availability of data and material**

384 The datasets generated and/or analyzed during the current study are available from the  
385 corresponding author on reasonable request.

### 386 **Ethics approval**

387 All animal experiments were performed in accordance with the Institutional Animal Ethics  
388 Committee (IAEC), Central Animal Facility, JSS AHER, Mysuru, India approved the study  
389 (JSSAHER/CPT/IAEC/014/2020).

390

391 **Author contributions statement**

392 **AB:** Methodology, Investigation, Data curation, Formal analysis, Writing – original draft,

393 **MB:** Methodology, Investigation. **SBC:** Conceptualization, Supervision, Project

394 administration, Data curation, Writing – review & editing. The manuscript has been read and

395 approved by all authors.

396

397 **References**

- 398 1. Bhat A, Pires AS, Tan V, Babu Chidambaram S, Guillemin GJ. (2020) Effects of Sleep  
399 Deprivation on the Tryptophan Metabolism. *Int J Tryptophan Res.*13.
- 400 2. Bishir M, Bhat A, Essa MM, Ekpo O, Ihunwo AO, Veeraraghavan VP, et al. (2020)  
401 Sleep Deprivation and Neurological Disorders [Internet]. Vol. 2020, BioMed Research  
402 International. Hindawi; e5764017.
- 403 3. You JC, Jones E, Cross DE, Lyon AC, Kang H, Newberg AB, et al. (2019) Association  
404 of  $\beta$ -Amyloid Burden With Sleep Dysfunction and Cognitive Impairment in Elderly  
405 Individuals With Cognitive Disorders. *JAMA Network Open.* e1913383.
- 406 4. Chattu VK, Manzar MdD, Kumary S, Burman D, Spence DW, Pandi-Perumal SR.  
407 (2018) The Global Problem of Insufficient Sleep and Its Serious Public Health  
408 Implications. *Healthcare (Basel).* 20;7(1):1.
- 409 5. Wang W, Yang L, Liu T, Ma Y, Huang S, He M, et al. (2020) Corilagin ameliorates  
410 sleep deprivation-induced memory impairments by inhibiting NOX2 and activating  
411 Nrf2. *Brain Research Bulletin.* 160:141–9.
- 412 6. Alhaider IA, Aleisa AM, Tran TT, Alkadhi KA. (2011) Sleep deprivation prevents  
413 stimulation-induced increases of levels of P-CREB and BDNF: Protection by caffeine.  
414 *Molecular and Cellular Neuroscience.*46(4):742–51.
- 415 7. Cao Y, Li Q, Liu L, Wu H, Huang F, Wang C, et al. (2019) Modafinil protects  
416 hippocampal neurons by suppressing excessive autophagy and apoptosis in mice with  
417 sleep deprivation. *British Journal of Pharmacology.*176(9):1282–97.
- 418 8. Havekes R, Park AJ, Tudor JC, Luczak VG, Hansen RT, Ferri SL, et al. (2016) Sleep  
419 deprivation causes memory deficits by negatively impacting neuronal connectivity in  
420 hippocampal area CA1. Takahashi JS, editor. *eLife.* 5:e13424.
- 421 9. Yoo S-S, Hu PT, Gujar N, Jolesz FA, Walker MP. (2007) A deficit in the ability to form  
422 new human memories without sleep. *Nature Neuroscience.* 10(3):385–92.

- 423 10. Ooms S, Overeem S, Besse K, Rikkert MO, Verbeek M, Claassen JAHR. (2014) Effect  
424 of 1 night of total sleep deprivation on cerebrospinal fluid  $\beta$ -amyloid 42 in healthy  
425 middle-aged men: a randomized clinical trial. *JAMA Neurol.* 71(8):971–7.
- 426 11. Shokri-Kojori E, Wang G-J, Wiers CE, Demiral SB, Guo M, Kim SW, et al. (2018)  $\beta$ -  
427 Amyloid accumulation in the human brain after one night of sleep deprivation. *PNAS.*  
428 ;115(17):4483–8.
- 429 12. Winer JR, Mander BA, Kumar S, Reed M, Baker SL, Jagust WJ, et al. (2020) Sleep  
430 Disturbance Forecasts  $\beta$ -Amyloid Accumulation across Subsequent Years. *Curr Biol.*  
431 ;30(21):4291-4298.e3.
- 432 13. Sharma RA, Varga AW, Bubu OM, Pirraglia E, Kam K, Parekh A, et al. (2018)  
433 Obstructive Sleep Apnea Severity Affects Amyloid Burden in Cognitively Normal  
434 Elderly. A Longitudinal Study. *Am J Respir Crit Care Med.*197(7):933–43.
- 435 14. Sprecher KE, Kosciak RL, Carlsson CM, Zetterberg H, Blennow K, Okonkwo OC, et al.  
436 (2017) Poor sleep is associated with CSF biomarkers of amyloid pathology in  
437 cognitively normal adults. *Neurology.* 89(5):445–53.
- 438 15. Lucey BP, Mawuenyega KG, Patterson BW, Elbert DL, Ovod V, Kasten T, et al. (2017)  
439 Associations Between  $\beta$ -Amyloid Kinetics and the  $\beta$ -Amyloid Diurnal Pattern in the  
440 Central Nervous System. *JAMA Neurol.* 74(2):207–15.
- 441 16. Mander BA, Marks SM, Vogel JW, Rao V, Lu B, Saletin JM, et al. (2015)  $\beta$ -amyloid  
442 disrupts human NREM slow waves and related hippocampus-dependent memory  
443 consolidation. *Nature Neuroscience.* 18(7):1051–7.
- 444 17. Marsh J, Bagol SH, Williams RSB, Dickson G, Alifragis P. (2017) Synapsin I  
445 phosphorylation is dysregulated by beta-amyloid oligomers and restored by valproic  
446 acid. *Neurobiol Dis.* 106:63–75.
- 447 18. Proctor DT, Coulson EJ, Dodd PR. (2010) Reduction in post-synaptic scaffolding PSD-  
448 95 and SAP-102 protein levels in the Alzheimer inferior temporal cortex is correlated  
449 with disease pathology. *J Alzheimers Dis.* 21(3):795–811.

- 450 19. Walsh DM, Selkoe DJ. (2007) A $\beta$  Oligomers – a decade of discovery. *Journal of*  
451 *Neurochemistry*.101(5):1172–84.
- 452 20. Chen Y, Huang X, Zhang Y, Rockenstein E, Bu G, Golde TE, et al. (2012) Alzheimer’s  
453  $\beta$ -Secretase (BACE1) Regulates the cAMP/PKA/CREB Pathway Independently of  $\beta$ -  
454 Amyloid. *J Neurosci.* ;32(33):11390–5.
- 455 21. Parihar MS, Brewer GJ. (2010) Amyloid Beta as a Modulator of Synaptic Plasticity. *J*  
456 *Alzheimers Dis.* 22(3):741–63.
- 457 22. Campbell IG, Guinan MJ, Horowitz JM. (2002) Sleep Deprivation Impairs Long-Term  
458 Potentiation in Rat Hippocampal Slices. *Journal of Neurophysiology.* Aug  
459 1;88(2):1073–6.
- 460 23. Ravassard P, Pachoud B, Comte J-C, Mejia-Perez C, Scoté-Blachon C, Gay N, et al.  
461 (2009) Paradoxical (REM) Sleep Deprivation Causes a Large and Rapidly Reversible  
462 Decrease in Long-Term Potentiation, Synaptic Transmission, Glutamate Receptor  
463 Protein Levels, and ERK/MAPK Activation in the Dorsal Hippocampus. *Sleep.*  
464 32(2):227–40.
- 465 24. Bhat A, Ray B, Mahalakshmi AM, Tuladhar S, Nandakumar D, Srinivasan M, et al.  
466 (2020) Phosphodiesterase-4 enzyme as a therapeutic target in neurological disorders.  
467 *Pharmacological Research*.105078.
- 468 25. Zhang H, Wang H, Zhang F, Li B, Zhou Y, Yu H, et al. (2019) Inhibition of  
469 phosphodiesterase-4D reverses memory deficits and depression-like effects via cAMP  
470 signaling in mouse models of Alzheimer’s disease. *The FASEB Journal*.33(S1):806.1-  
471 806.1.
- 472 26. Perez-Gonzalez R, Pascual C, Antequera D, Bolos M, Redondo M, Perez DI, et al.  
473 (2013) Phosphodiesterase 7 inhibitor reduced cognitive impairment and pathological  
474 hallmarks in a mouse model of Alzheimer’s disease. *Neurobiology of*  
475 *Aging*.34(9):2133–45.
- 476 27. Havekes R, Park AJ, Tolentino RE, Bruinenberg VM, Tudor JC, Lee Y, et al. (2016)  
477 Compartmentalized PDE4A5 Signaling Impairs Hippocampal Synaptic Plasticity and  
478 Long-Term Memory. *J Neurosci.* 36(34):8936–46.



- 479 28. Xu Y, Zhu N, Xu W, Ye H, Liu K, Wu F, et al. (2018) Inhibition of Phosphodiesterase-  
480 4 Reverses A $\beta$ -Induced Memory Impairment by Regulation of HPA Axis Related  
481 cAMP Signaling. *Front Aging Neurosci.*;10.
- 482 29. Bhat A, Tan V, Heng B, Lovejoy DB, Sakharkar MK, Essa MM, et al. (2020)  
483 Roflumilast, a cAMP-Specific Phosphodiesterase-4 Inhibitor, Reduces Oxidative Stress  
484 and Improves Synapse Functions in Human Cortical Neurons Exposed to the  
485 Excitotoxin Quinolinic Acid. *ACS Chem Neurosci.*  
486 DOI:10.1021/acschemneuro.0c00636
- 487 30. Cui S-Y, Yang M-X, Zhang Y-H, Zheng V, Zhang H-T, Gurney ME, et al. (2019)  
488 Protection from Amyloid  $\beta$  Peptide-Induced Memory, Biochemical, and Morphological  
489 Deficits by a Phosphodiesterase-4D Allosteric Inhibitor. *J Pharmacol Exp Ther.*  
490 371(2):250–9.
- 491 31. Bollen E, Prickaerts J. (2012) Phosphodiesterases in neurodegenerative disorders.  
492 *IUBMB Life.* 64(12):965–70.
- 493 32. Zhang H-T, O'Donnell JM. (2000) Effects of rolipram on scopolamine-induced  
494 impairment of working and reference memory in the radial-arm maze tests in rats.  
495 *Psychopharmacology* 150(3):311–6.
- 496 33. Zhang H-T, Crissman AM, Dorairaj NR, Chandler LJ, O'Donnell JM. (2000) Inhibition  
497 of Cyclic AMP Phosphodiesterase (PDE4) Reverses Memory Deficits Associated with  
498 NMDA Receptor Antagonism. *Neuropsychopharmacology.* 23(2):198–204.
- 499 34. Rabe KF, Bateman ED, O'Donnell D, Witte S, Bredenbröker D, Bethke TD. (2005)  
500 Roflumilast--an oral anti-inflammatory treatment for chronic obstructive pulmonary  
501 disease: a randomised controlled trial. *Lancet.* 366(9485):563–71.
- 502 35. Peng S, Yan H-Z, Liu P-R, Shi X-W, Liu C-L, Liu Q, et al. (2018) Phosphodiesterase 4  
503 Inhibitor Roflumilast Protects Rat Hippocampal Neurons from Sevoflurane Induced  
504 Injury via Modulation of MEK/ERK Signaling Pathway. *Cell Physiol*  
505 *Biochem.*;45(6):2329–37.

- 506 36. Vanmierlo T, Creemers P, Akkerman S, van Duinen M, Sambeth A, De Vry J, et al.  
507 (2016) The PDE4 inhibitor roflumilast improves memory in rodents at non-emetic  
508 doses. *Behav Brain Res.* 303:26–33.
- 509 37. Blokland A, Van Duinen MA, Sambeth A, Heckman PRA, Tsai M, Lahu G, et al.  
510 (2019) Acute treatment with the PDE4 inhibitor roflumilast improves verbal word  
511 memory in healthy old individuals: a double-blind placebo-controlled study.  
512 *Neurobiology of Aging.* ;77:37–43.
- 513 38. Jabaris SSL, Sumathy H, Girish R, Narayanan S, Sugumar M, Saravana Babu C, et al.  
514 (2015) Phosphodiesterase-4 inhibitors ameliorates cognitive deficits in  
515 deoxycorticosterone acetate induced hypertensive rats via cAMP/CREB signaling  
516 system. *Brain Research.*1622:279–91.
- 517 39. Patti CL, Zanin KA, Sanday L, Kameda SR, Fernandes-Santos L, Fernandes HA, et al.  
518 (2010) Effects of Sleep Deprivation on Memory in Mice: Role of State-Dependent  
519 Learning. *Sleep.* 33(12):1669–79.
- 520 40. Grahnstedt S, Ursin R. (1985) Platform sleep deprivation affects deep slow wave sleep  
521 in addition to REM sleep. *Behav Brain Res.*18(3):233–9.
- 522 41. Prickaerts J, van Staveren WCG, Şik A, Markerink-van Ittersum M, Niewöhner U, van  
523 der Staay FJ, et al. (2002) Effects of two selective phosphodiesterase type 5 inhibitors,  
524 sildenafil and vardenafil, on object recognition memory and hippocampal cyclic GMP  
525 levels in the rat. *Neuroscience.* 113(2):351–61.
- 526 42. McGirr A, Lipina TV, Mun H-S, Georgiou J, Al-Amri AH, Ng E, et al. (2016) Specific  
527 Inhibition of Phosphodiesterase-4B Results in Anxiolysis and Facilitates Memory  
528 Acquisition. *Neuropsychopharmacology.* 41(4):1080–92.
- 529 43. Gupta A, Goyal R. (2016) Amyloid beta plaque: a culprit for neurodegeneration. *Acta*  
530 *Neurol Belg.*116(4):445–50.
- 531 44. Li D, Specht CG, Waites CL, Butler-Munro C, Leal-Ortiz S, Foote JW, et al. (2011)  
532 SAP97 directs NMDA receptor spine targeting and synaptic plasticity. *J Physiol.* 589(Pt  
533 18):4491–510.

- 534 45. Kang J-E, Lim MM, Bateman RJ, Lee JJ, Smyth LP, Cirrito JR, et al. (2009) Amyloid-  
535 beta dynamics are regulated by orexin and the sleep-wake cycle. *Science*.  
536 326(5955):1005–7.
- 537 46. Brice KN, Hagen CW, Peterman JL, Figg JW, Braden PN, Chumley MJ, et al. (2020)  
538 Chronic sleep restriction increases soluble hippocampal A $\beta$ -42 and impairs cognitive  
539 performance. *Physiol Behav*. 226:113128.
- 540 47. Palop JJ, Mucke L. (2010) Amyloid- $\beta$  Induced Neuronal Dysfunction in Alzheimer's  
541 Disease: From Synapses toward Neural Networks. *Nat Neurosci*. 13(7):812–8.
- 542 48. Wang L, Xiaokaiti Y, Wang G, Xu X, Chen L, Huang X, et al. (2017) Inhibition of  
543 PDE2 reverses beta amyloid induced memory impairment through regulation of  
544 PKA/PKG-dependent neuro-inflammatory and apoptotic pathways. *Scientific Reports*.  
545 7(1):12044.
- 546 49. Tong L, Thornton PL, Balazs R, Cotman CW. (2001) Beta -amyloid-(1-42) impairs  
547 activity-dependent cAMP-response element-binding protein signaling in neurons at  
548 concentrations in which cell survival is not compromised. *J Biol Chem*. 276(20):17301–  
549 6.
- 550 50. Paes D, Lardenoije R, Carollo RM, Roubroeks JAY, Schepers M, Coleman P, et al.  
551 (2021) Increased isoform-specific phosphodiesterase 4D expression is associated with  
552 pathology and cognitive impairment in Alzheimer's disease. *Neurobiol Aging*. 97:56–  
553 64.
- 554 51. Aizawa T, Wei H, Miano JM, Abe J, Berk BC, Yan C. (2003) Role of  
555 phosphodiesterase 3 in NO/cGMP-mediated antiinflammatory effects in vascular  
556 smooth muscle cells. *Circ Res*. 93(5):406–13.
- 557 52. Chong YH, Shin SA, Lee HJ, Kang JHL, Suh Y-H. (2002) Molecular mechanisms  
558 underlying cyclic AMP inhibition of macrophage dependent TNF-alpha production and  
559 neurotoxicity in response to amyloidogenic C-terminal fragment of Alzheimer's  
560 amyloid precursor protein. *J Neuroimmunol*. 133(1–2):160–74.

- 561 53. Tibbo AJ, Tejada GS, Baillie GS. (2019) Understanding PDE4's function in  
562 Alzheimer's disease; a target for novel therapeutic approaches. *Biochemical Society*  
563 *Transactions*. 47(5):1557–65.
- 564 54. Feng H, Wang C, He W, Wu X, Li S, Zeng Z, et al. (2019) Roflumilast ameliorates  
565 cognitive impairment in APP/PS1 mice via cAMP/CREB/BDNF signaling and anti-  
566 neuroinflammatory effects. *Metab Brain Dis*. 34(2):583–91.
- 567 55. Prickaerts J, Heckman PRA, Blokland A. (2017) Investigational phosphodiesterase  
568 inhibitors in phase I and phase II clinical trials for Alzheimer's disease. *Expert Opin*  
569 *Investig Drugs*. 26(9):1033–48.
- 570 56. Ashour NH, El-Tanbouly DM, El Sayed NS, Khattab MM. (2021) Roflumilast  
571 ameliorates cognitive deficits in a mouse model of amyloidogenesis and tauopathy:  
572 Involvement of nitric oxide status, A $\beta$  extrusion transporter ABCB1, and reversal by  
573 PKA inhibitor H89. *Progress in Neuro-Psychopharmacology and Biological Psychiatry*.  
574 111:110366.
- 575 57. Lacor PN, Buniel MC, Furlow PW, Clemente AS, Velasco PT, Wood M, et al. (2007)  
576 A $\beta$  Oligomer-Induced Aberrations in Synapse Composition, Shape, and Density Provide  
577 a Molecular Basis for Loss of Connectivity in Alzheimer's Disease. *J Neurosci*.  
578 27(4):796–807.
- 579 58. Chen F, He Y, Wang P, Wei P, Feng H, Rao Y, et al. (2018) Curcumin can influence  
580 synaptic dysfunction in APP<sup>swe</sup>/PS1<sup>dE9</sup> mice. *Journal of Traditional Chinese Medical*  
581 *Sciences*. 5(2):168–76.
- 582 59. Barbieri R, Contestabile A, Ciardo MG, Forte N, Marte A, Baldelli P, et al. (2018)  
583 Synapsin I and Synapsin II regulate neurogenesis in the dentate gyrus of adult mice.  
584 *Oncotarget*. 9(27):18760–74.
- 585 60. Corradi A, Zanardi A, Giacomini C, Onofri F, Valtorta F, Zoli M, et al. (2008)  
586 Synapsin-I- and synapsin-II-null mice display an increased age-dependent cognitive  
587 impairment. *J Cell Sci*. 121(18):3042–51.

- 588 61. Alhaider IA, Aleisa AM, Tran TT, Alzoubi KH, Alkadhi KA. (2010) Chronic Caffeine  
589 Treatment Prevents Sleep Deprivation-Induced Impairment of Cognitive Function and  
590 Synaptic Plasticity. *Sleep*.33(4):437–44.
- 591 62. Vecsey CG, Huang T, Abel T. (2018) Sleep deprivation impairs synaptic tagging in  
592 mouse hippocampal slices. *Neurobiol Learn Mem*. 154:136–40.
- 593 63. Wadhwa M, Sahu S, Kumari P, Kauser H, Ray K, Panjwani U. (2015) Caffeine and  
594 modafinil given during 48 h sleep deprivation modulate object recognition memory and  
595 synaptic proteins in the hippocampus of the rat. *Behav Brain Res*. 294:95–101.
- 596 64. Ansari MA, Roberts KN, Scheff SW. (2008) Oxidative stress and modification of  
597 synaptic proteins in hippocampus after traumatic brain injury. *Free Radic Biol Med*.  
598 45(4):443–52.
- 599 65. Havekes R, Bruinenberg VM, Tudor JC, Ferri SL, Baumann A, Meerlo P, et al. (2014)  
600 Transiently Increasing cAMP Levels Selectively in Hippocampal Excitatory Neurons  
601 during Sleep Deprivation Prevents Memory Deficits Caused by Sleep Loss. *J Neurosci*.  
602 34(47):15715–21.
- 603 66. Bollen E, Puzzo D, Rutten K, Privitera L, De Vry J, Vanmierlo T, et al. (2014)  
604 Improved Long-Term Memory via Enhancing cGMP-PKG Signaling Requires cAMP-  
605 PKA Signaling. *Neuropsychopharmacology*.39(11):2497–505.
- 606 67. Wang C, Yang X-M, Zhuo Y-Y, Zhou H, Lin H-B, Cheng Y-F, et al. (2012) The  
607 phosphodiesterase-4 inhibitor rolipram reverses A $\beta$ -induced cognitive impairment and  
608 neuroinflammatory and apoptotic responses in rats. *International Journal of*  
609 *Neuropsychopharmacology*.15(6):749–66.
- 610 68. Smith C, Trageser KJ, Wu H, Herman FJ, Iqbal UH, Sebastian-Valverde M, et al.  
611 (2021) Anxiolytic effects of NLRP3 inflammasome inhibition in a model of chronic  
612 sleep deprivation. *Transl Psychiatry*. 11(1):1–15.
- 613 69. Xie G, Huang X, Li H, Wang P, Huang P. (2021) Caffeine-related effects on cognitive  
614 performance: Roles of apoptosis in rat hippocampus following sleep deprivation.  
615 *Biochemical and Biophysical Research Communications*. 534:632-638

- 616 70. Pearse DD, Hughes ZA. (2016) PDE4B as a microglia target to reduce  
617 neuroinflammation. *Glia*. 64(10):1698–709.
- 618 71. Zuo G, Zhang T, Huang L, Araujo C, Peng J, Travis Z, et al. (2019) Activation of TGR5  
619 with INT-777 attenuates oxidative stress and neuronal apoptosis via  
620 cAMP/PKC $\epsilon$ /ALDH2 pathway after subarachnoid hemorrhage in rats. *Free Radical*  
621 *Biology and Medicine*. 143:441–53.
- 622 72. Wang H, Zhang F, Xu Y, Fu H, Wang X, Wang L, et al. (2020) The Phosphodiesterase-  
623 4 Inhibitor Roflumilast, a Potential Treatment for the Comorbidity of Memory Loss and  
624 Depression in Alzheimer’s Disease: A Preclinical Study in APP/PS1 Transgenic Mice.  
625 *International Journal of Neuropsychopharmacology*. 23(10):700–11.

626

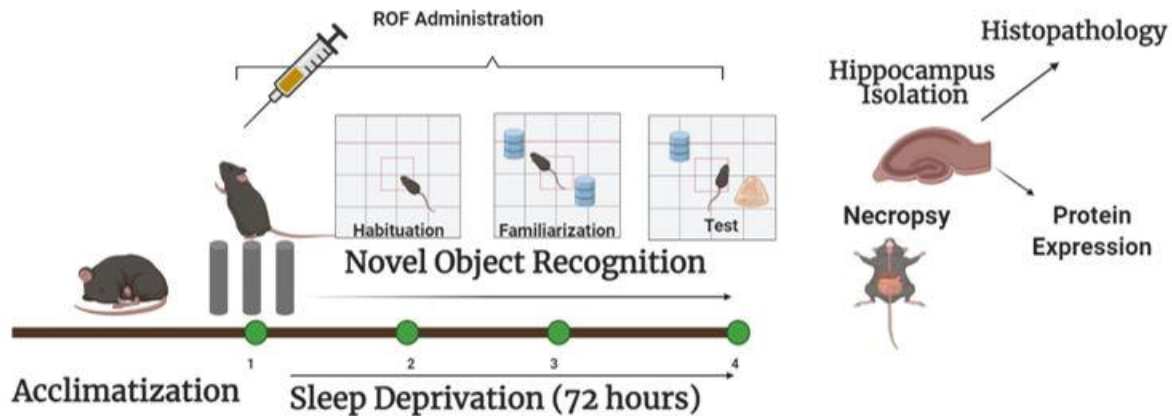

**Figure 1:** A schematic outline of the study design

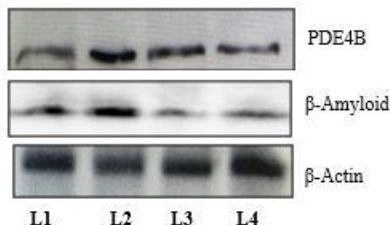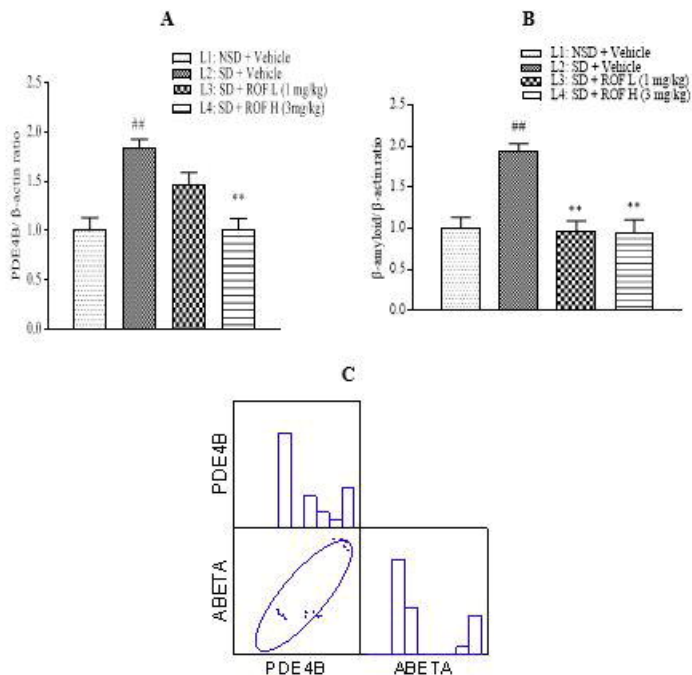

**Figure 2: Roflumilast downregulates the expression of PDE4B and  $\beta$ -amyloid in hippocampus of SD mice.** (A) Quantification of PDE4B/ $\beta$ -actin (B) Quantification of  $\beta$ -amyloid/ $\beta$ -actin. Data are presented as the mean  $\pm$  SEM (n=6), ## denotes  $p < 0.01$  versus vehicle treated NSD group, \*\* denotes  $p < 0.01$  versus vehicle treated SD group. Correlation analysis was performed using Pearson's correlation test; graphs showing the correlation between PDE4B and A $\beta$ .



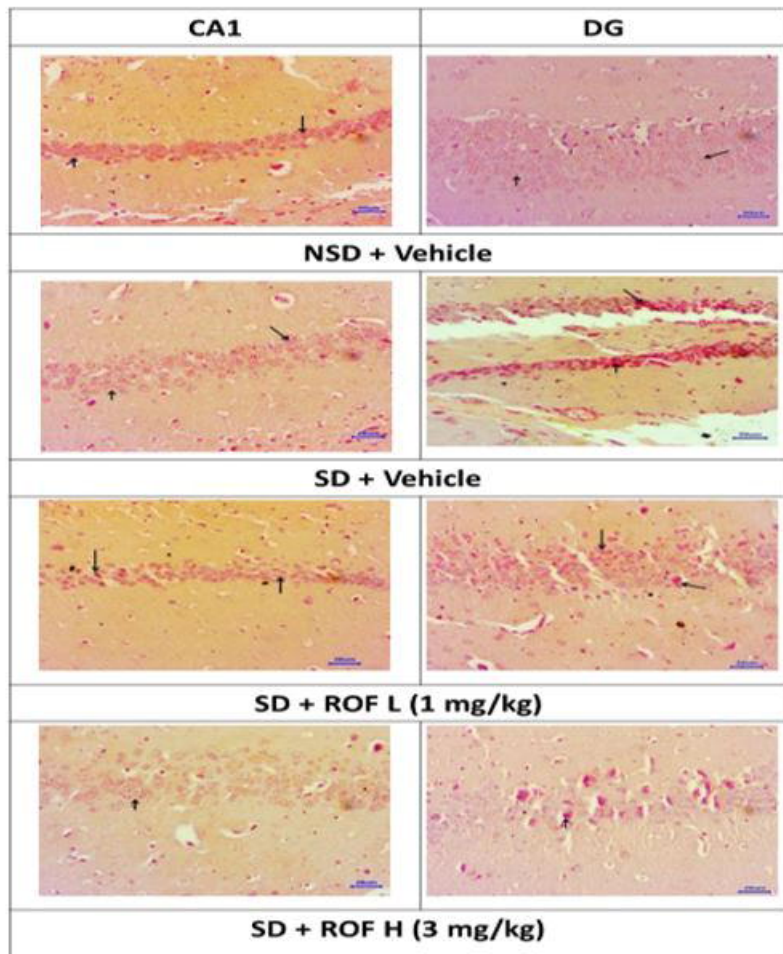

**Figure 3:** Effect of ROF on amyloid- $\beta$  plaques in CA1 and DG regions of hippocampus in sleep deprived mice. Congo red staining of CA1 and dentate gyrus region of hippocampus.

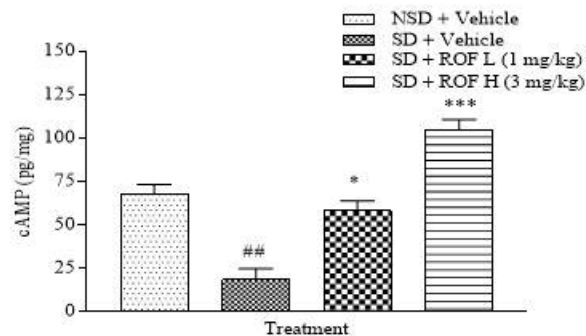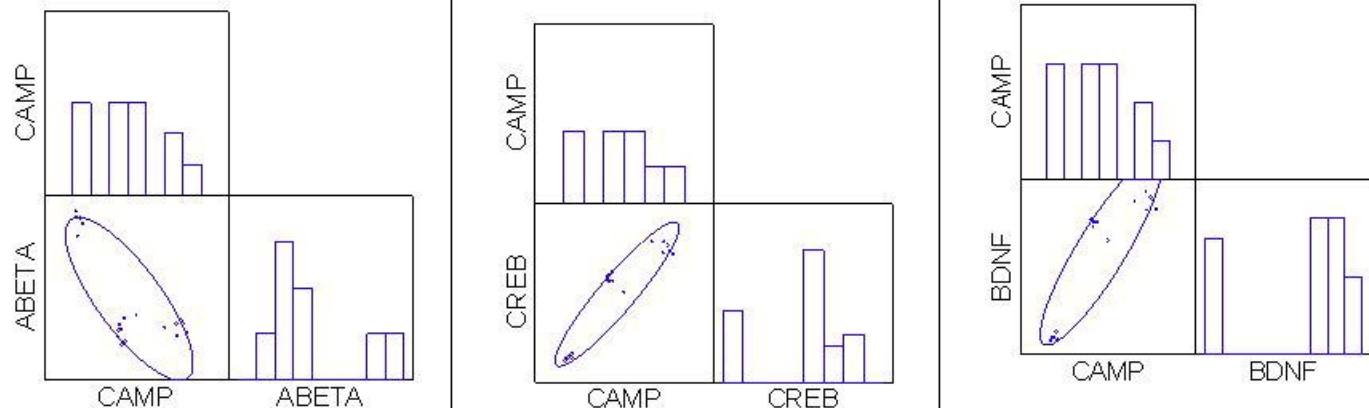

**Figure 4: Roflumilast administration restores SD mediated decrease in cAMP level in mice.** Data are presented as the mean  $\pm$  SEM ( $n = 6$ ). ## denotes  $p < 0.01$  versus vehicle treated NSD group, \* denotes  $p < 0.05$ , and \*\* denotes  $p < 0.01$  versus vehicle treated SD group. Correlation analysis was performed using Pearson's correlation test; graphs showing the correlation between cAMP and A $\beta$ , cAMP and CREB, cAMP and BDNF.

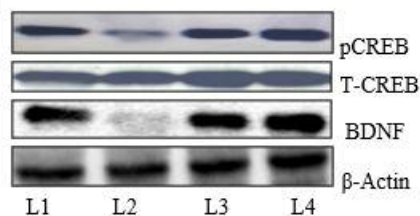

**A**

L1: NSD + Vehicle  
 L2: SD + Vehicle  
 L3: SD + ROF L (1 mg/kg)  
 L4: SD + ROF H (3 mg/kg)

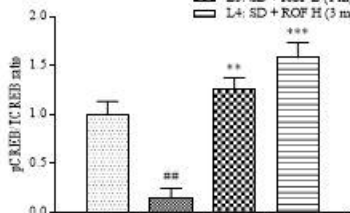

**C**

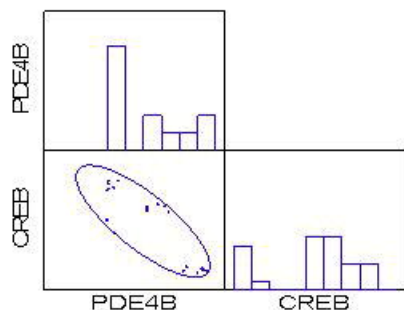

**B**

L1: NSD + Vehicle  
 L2: SD + Vehicle  
 L3: SD + ROF L (1 mg/kg)  
 L4: SD + ROF H (3 mg/kg)

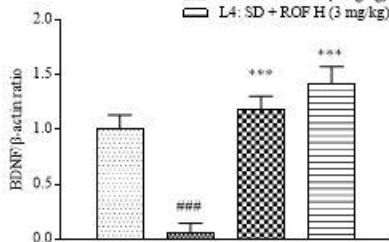

**D**

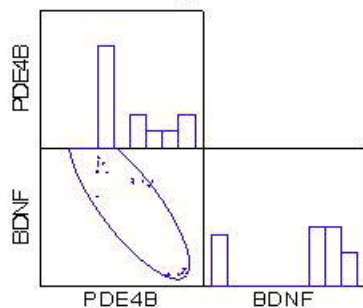

**Figure 5: Roflumilast administration increases transcription factors in sleep deprived mice.** Quantification of pCREB/TCREB (B) Quantification of BDNF/ $\beta$ -actin. Data are presented as the mean  $\pm$  SEM (n = 6), ## denotes  $p < 0.01$ , ### denotes  $p < 0.001$  versus vehicle treated NSD group, \*\* denotes  $p < 0.01$ , \*\*\* denotes  $p < 0.001$  versus vehicle treated SD group. Correlation analysis was performed using Pearson's correlation test; graphs showing the correlation between (C) CREB and PDE4B, (D) BDNF and PDE4B.

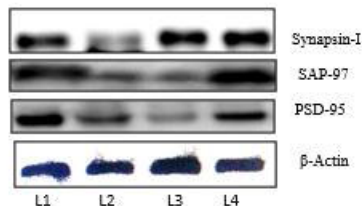

**A**

L1: NSD + Vehicle  
 L2: SD + Vehicle  
 L3: SD + ROFL (1 mg/kg)  
 L4: SD + ROFL H (3 mg/kg)

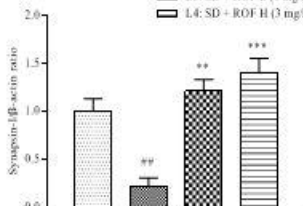

**B**

L1: NSD + Vehicle  
 L2: SD + Vehicle  
 L3: SD + ROFL (1 mg/kg)  
 L4: SD + ROFL H (3 mg/kg)

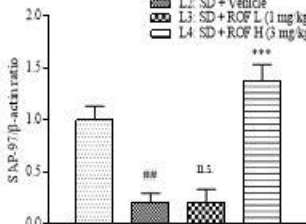

**C**

L1: NSD + Vehicle  
 L2: SD + Vehicle  
 L3: SD + ROFL (1 mg/kg)  
 L4: SD + ROFL H (3 mg/kg)

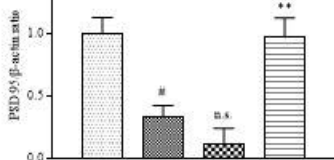

**D**

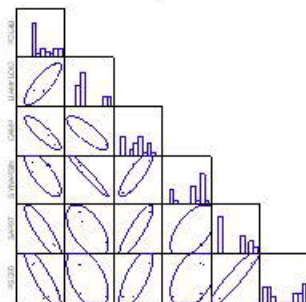

**Figure 6: Roflumilast upregulates the expression of synaptic proteins in SD mice. (A)** Quantification of Synapsin-I/ $\beta$ -actin. **(B)** Quantification of SAP-97/ $\beta$ -actin. **(C)** Quantification of PSD-95/ $\beta$ -actin. Data are presented as the mean  $\pm$  SEM (n=6). # denotes  $p < 0.05$ , ## denotes  $p < 0.01$  versus vehicle treated NSD group, \*\* denotes  $p < 0.01$  and \*\*\* denotes  $p < 0.001$  versus vehicle treated SD group, n.s. denotes non-significant. **(D)** Correlation analysis was performed using Pearson's correlation test; graphs showing the correlation between cAMP, PDE4B, A $\beta$  with SAP-97, Synapsin-I, PSD-95.

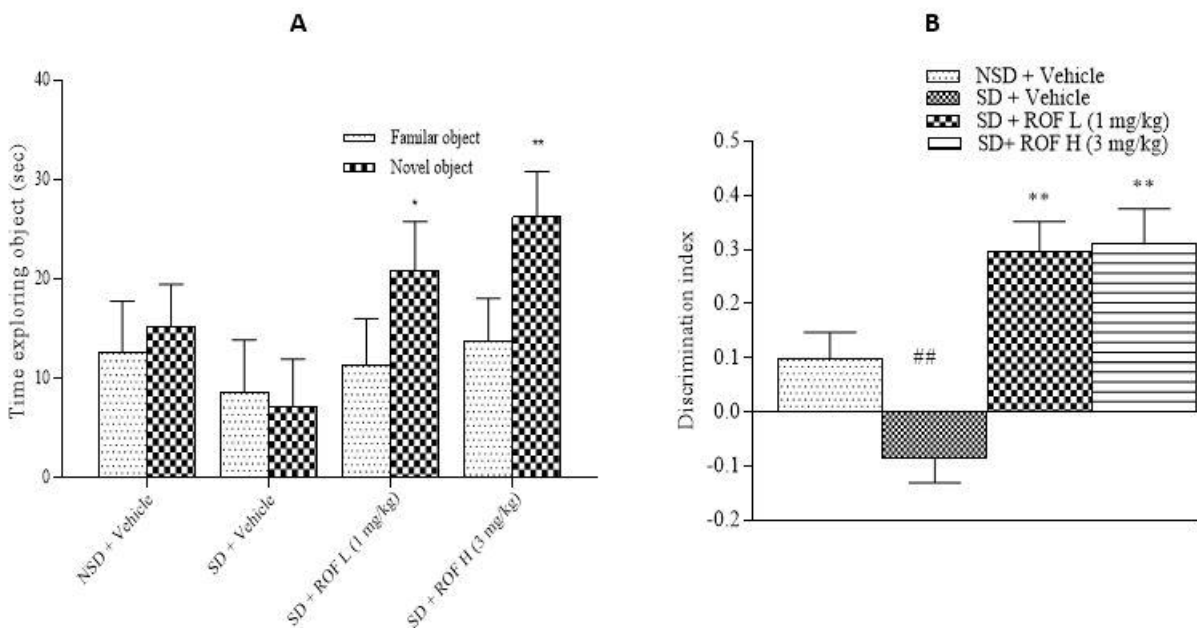

**Figure 7: Effect of Roflumilast on recognition memory evaluated by NORT in sleep deprived mice.** (A) time exploring the familiar and novel object (B) Discrimination index. Data are presented as the mean  $\pm$  SEM (n = 10). ## denotes  $p < 0.01$  versus NSD group and \* denotes  $p < 0.05$ , \*\* denotes  $p < 0.01$ , versus SD group.

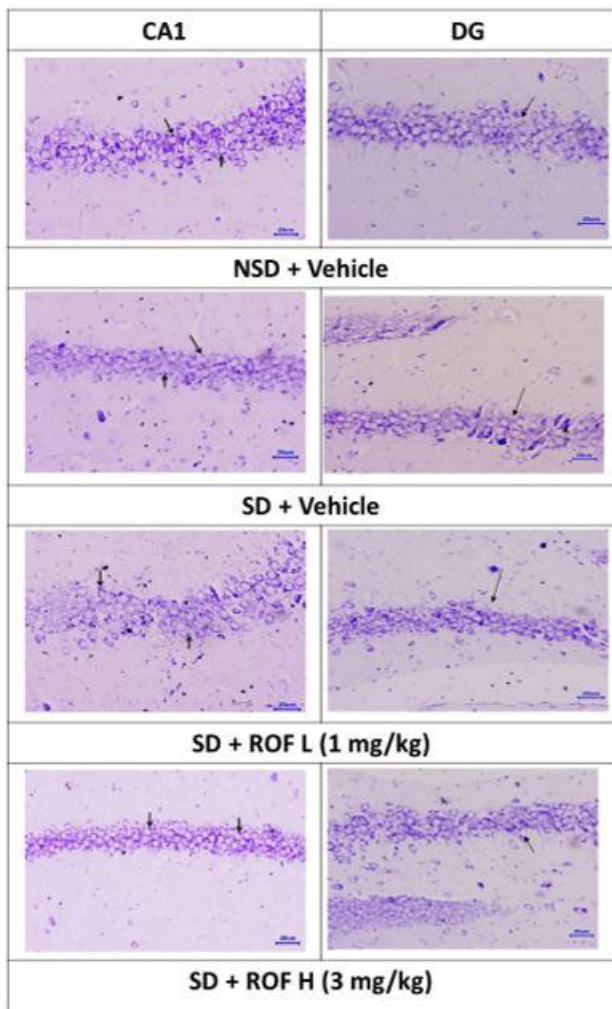

**Figure 8:** Effect of ROF on hippocampal neuronal morphology of mice sleep deprived for 72 h. Nissl staining of CA1 and dentate gyrus region of hippocampus.

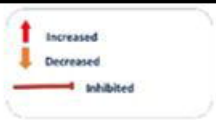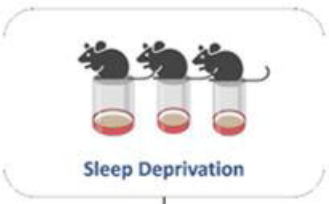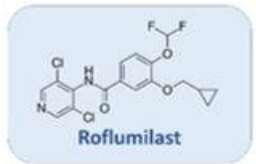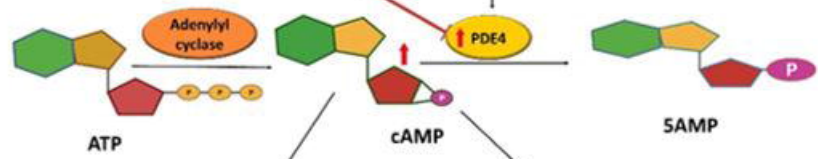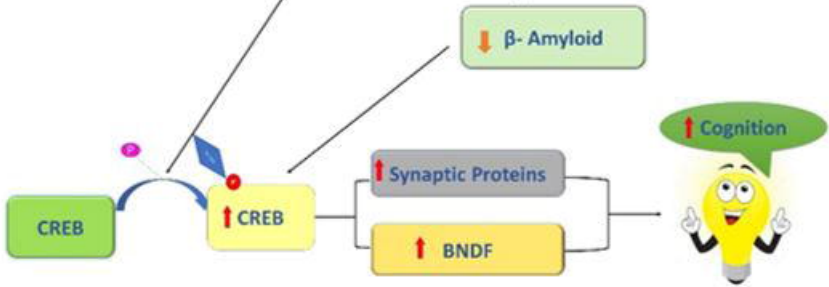

Source: https://biorxiv.org/content/10.1101/2021.11.28.470251v1.full.pdf
